# Supplementary material
Source: PubMed Central journal article supplement (PMC4577401)
Supplement: supp_pp.15.00619_PP2015-00619R1_Merged_PDF.pdf [file supp_pp.15.00619_PP2015-00619R1_Merged_PDF.pdf]

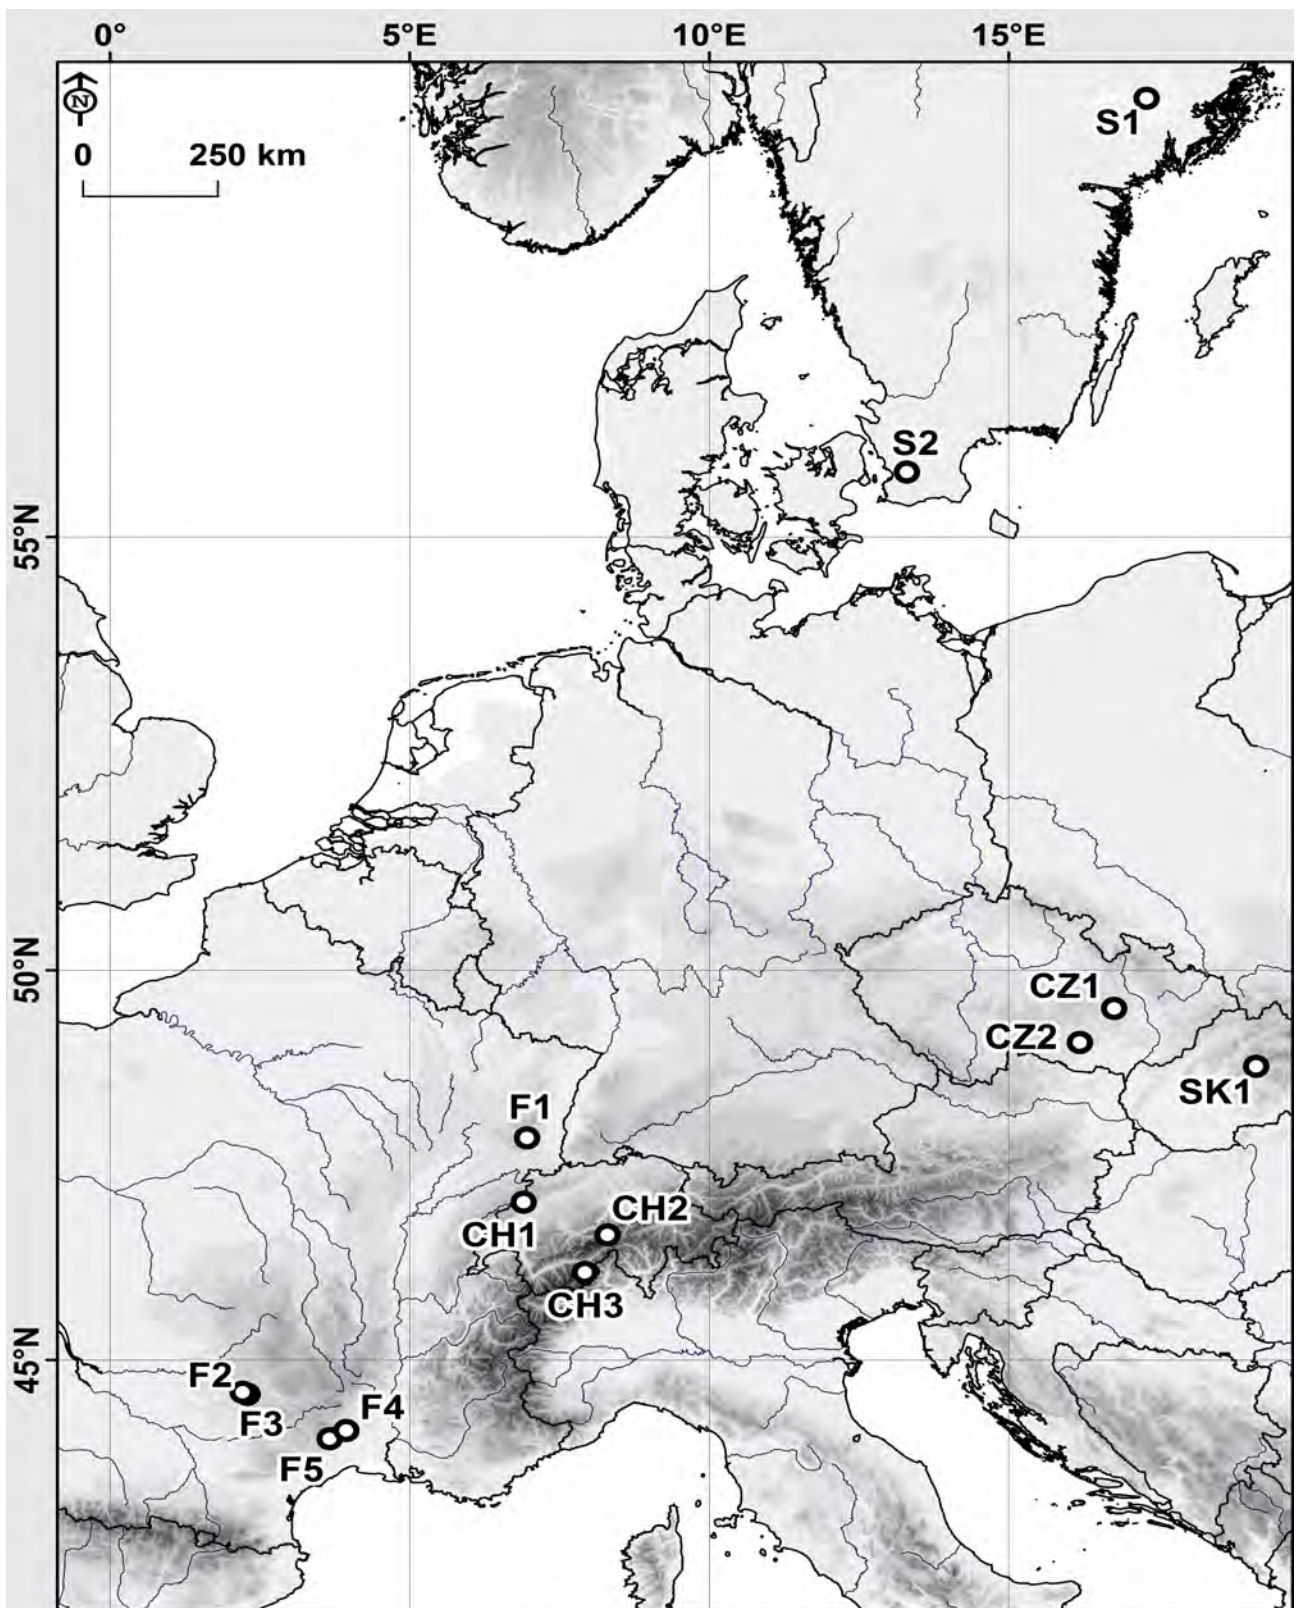

**Supplementa Figure 1.** Location of *Noccaea caerulescens* populations analyzed in the present study. S1: Kungs-Husby, S2: Sularp, CH1: Mont d'Amin, CH2: Haslital, CH3: Vallée de Saas, CZ1: Kořenec, CZ2: Mohelno, SK1: Špania dolina, F1: Bergenbach, F2: Viviez, F3: Puy de Wolf, F4: St. Felix de Pallières, and F5: St. Laurent le Minier.

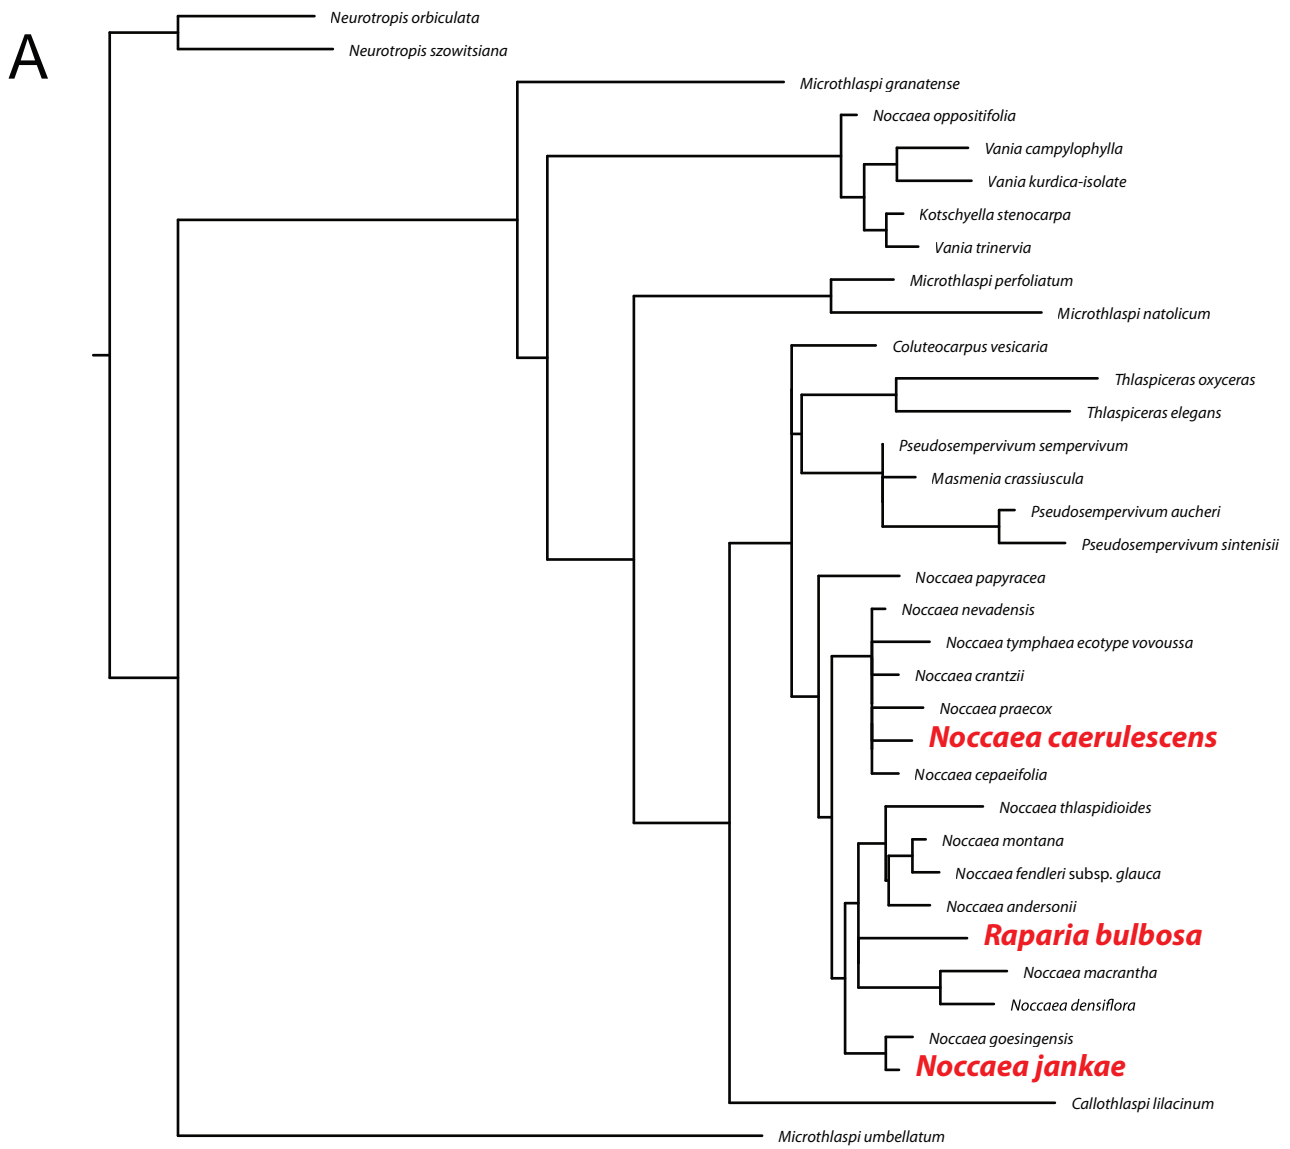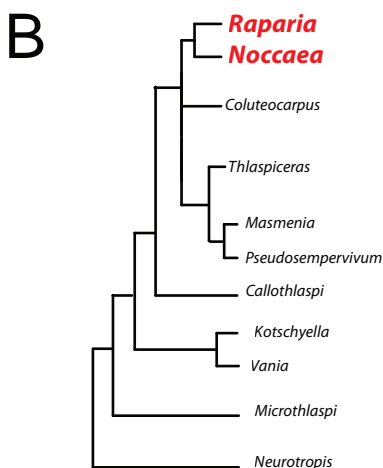

**Supplemental Figure 2.** Phylogenetic relationships between Coluteocarpeae taxa analyzed in this study. (A) Phylogenetic tree of Coluteocarpeae based on ITS 1 and 2 sequences at the Brassibase website (<http://brassibase.cos.uni-heidelberg.de/>; Kiefer et al. 2014). Here the genus *Raparia* is embedded within the genus *Noccaea*. (B) The same phylogeny showing *Raparia* as a sister genus to *Noccaea* (redrawn from Koch and German 2013).

# *Raparia bulbosa*

RB1, NJ1

# *Noccaea jankae*

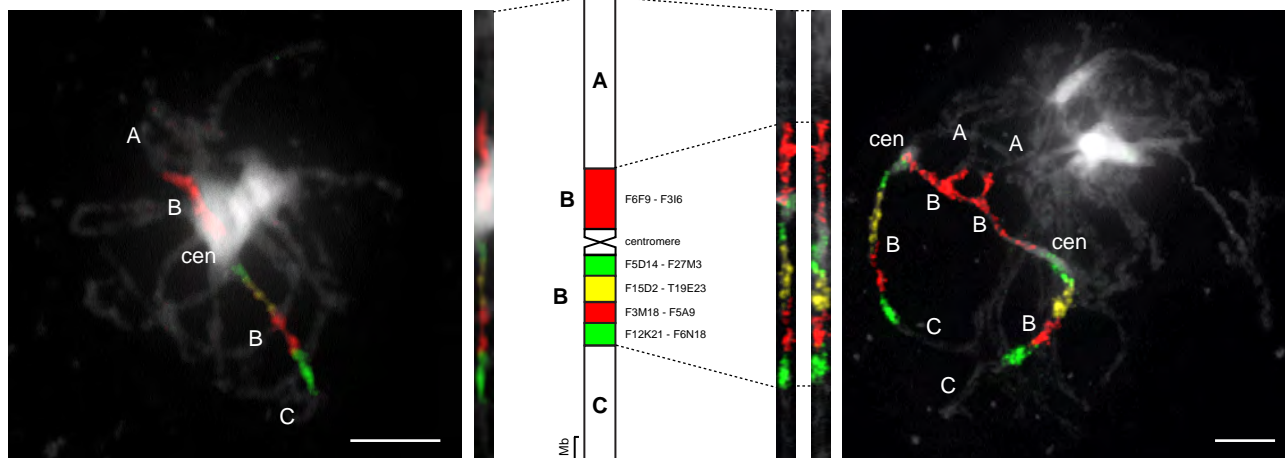

RB1, NJ1

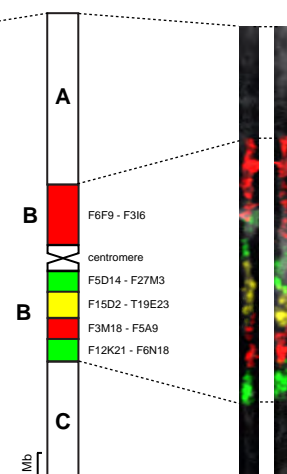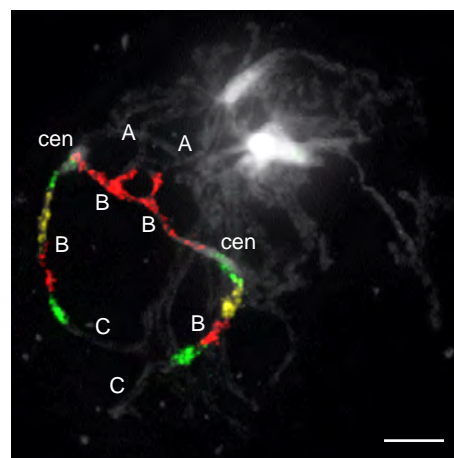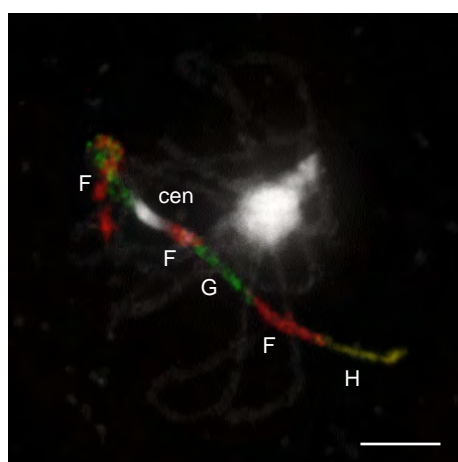

RB3, NJ3

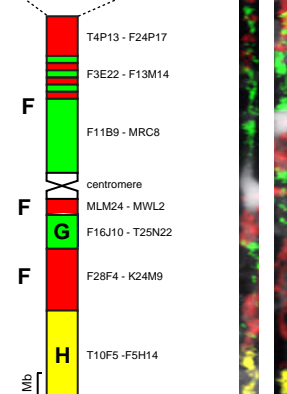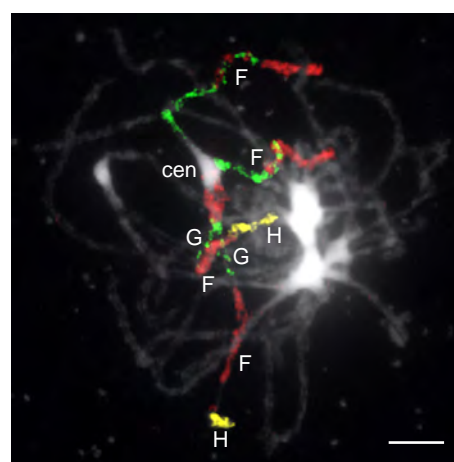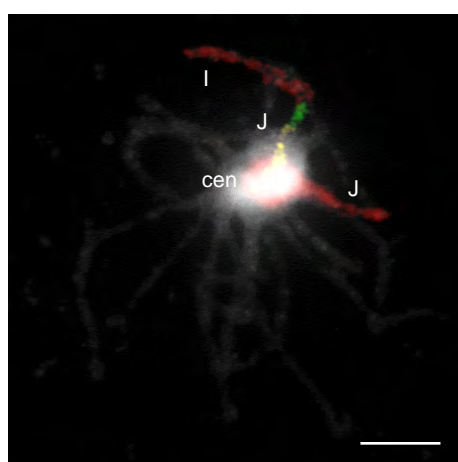

RB4, NJ4

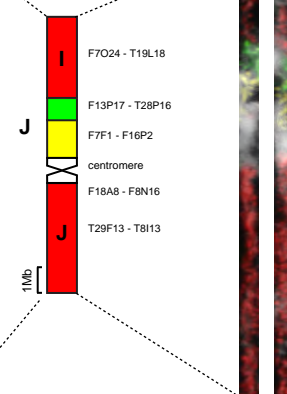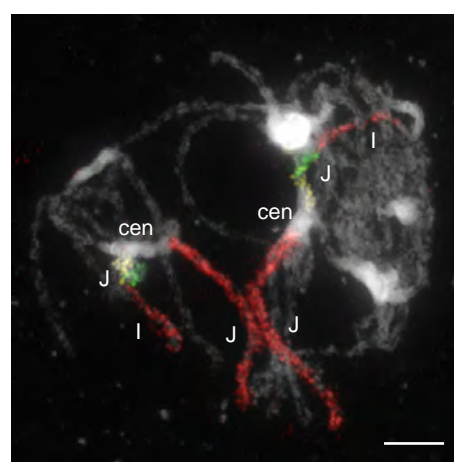

**Supplemental Figure 3.** Comparative structure of *R. bulbosa* and *N. jankae* chromosomes as inferred by CCP (see Figure 3 for complete karyotypes of both species). Chromosomes were painted with *A. thaliana* BAC contigs labelled by biotin-dUTP (red), digoxigenin-dUTP (green), and Cy3-dUTP (yellow); BAC clone coordinates of each contig used are given. Chromosomes counterstained by DAPI. All scales, 5 μm.

*Raparia bulbosa*

RB5, NJ5

*Noccaea jankae*

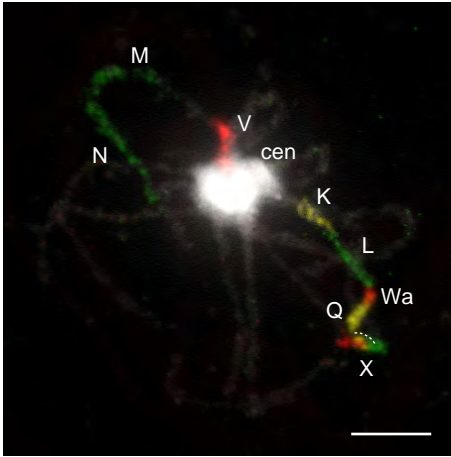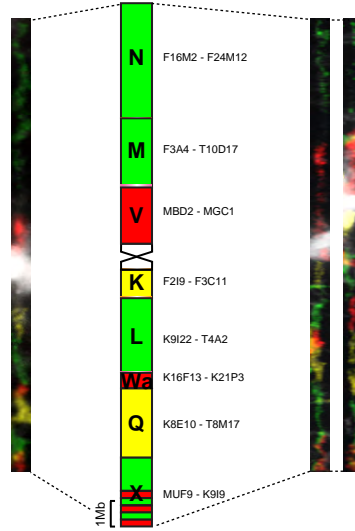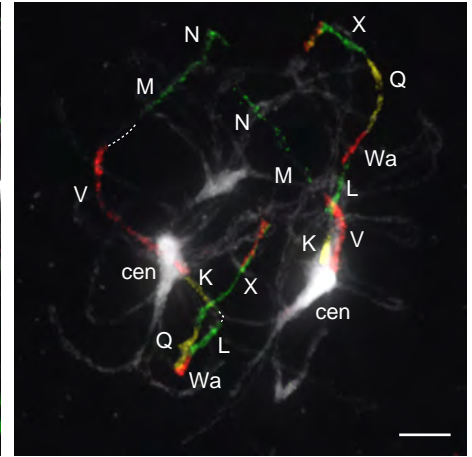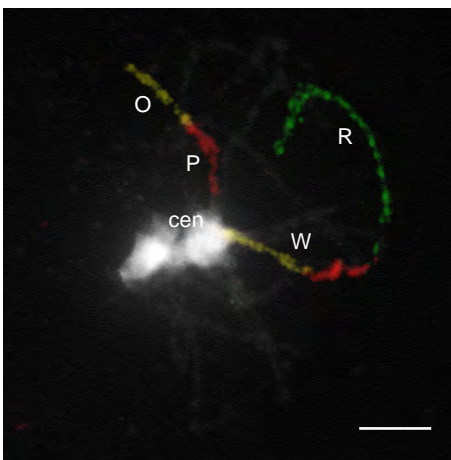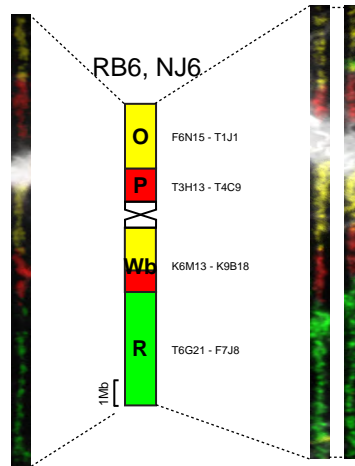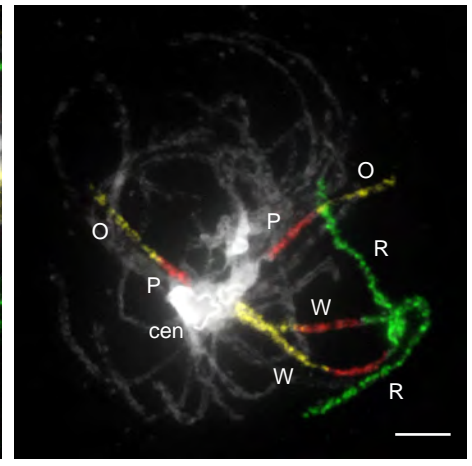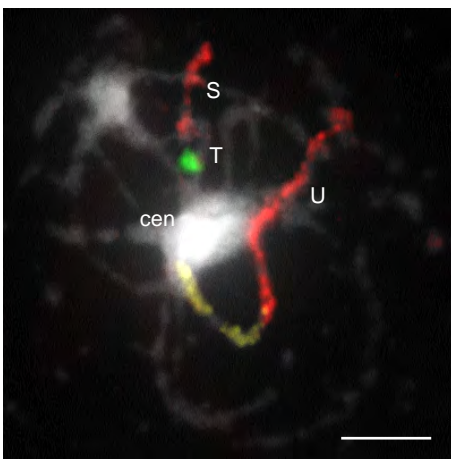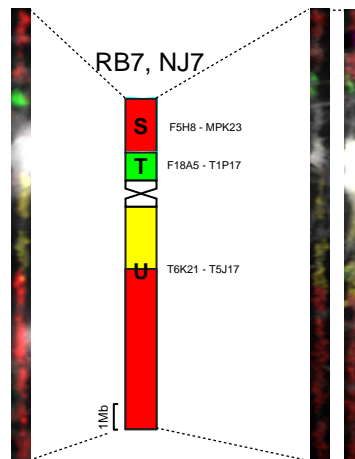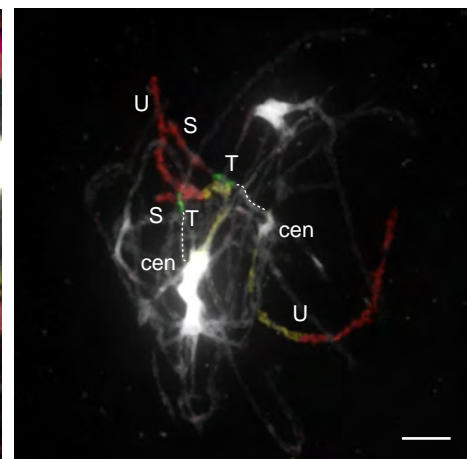

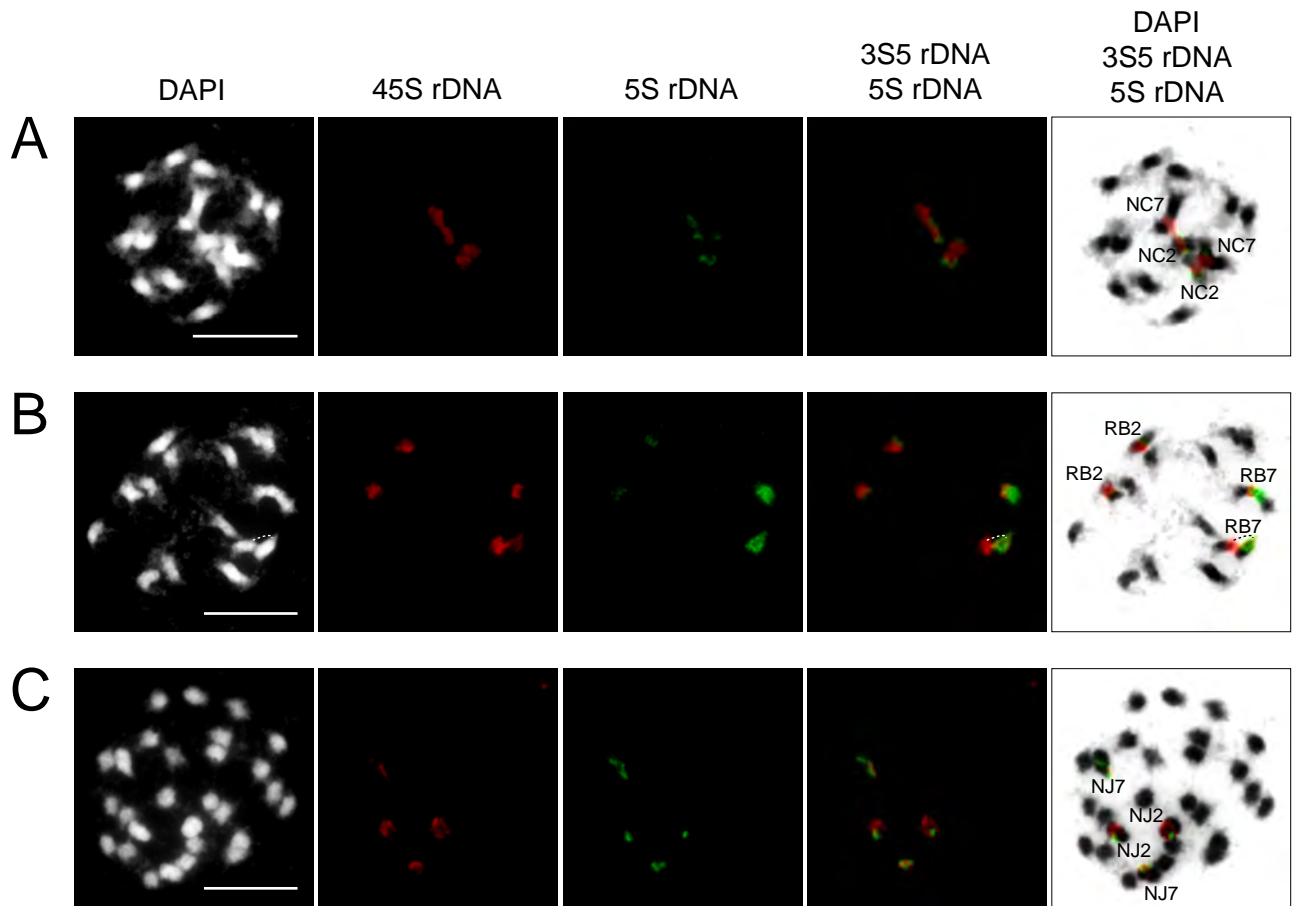

**Supplemental Figure 4.** Fluorescence *in situ* localization of 5S (green) and 35S (red) rDNA loci on chromosomes in *N. caerulea* (A), *N. jankae* (B) and *R. bulbosa* (C). Chromosomes were identified by CCP (see Figure 1, 2, and S3) and counterstained by DAPI. All scales, 5  $\mu$ m.

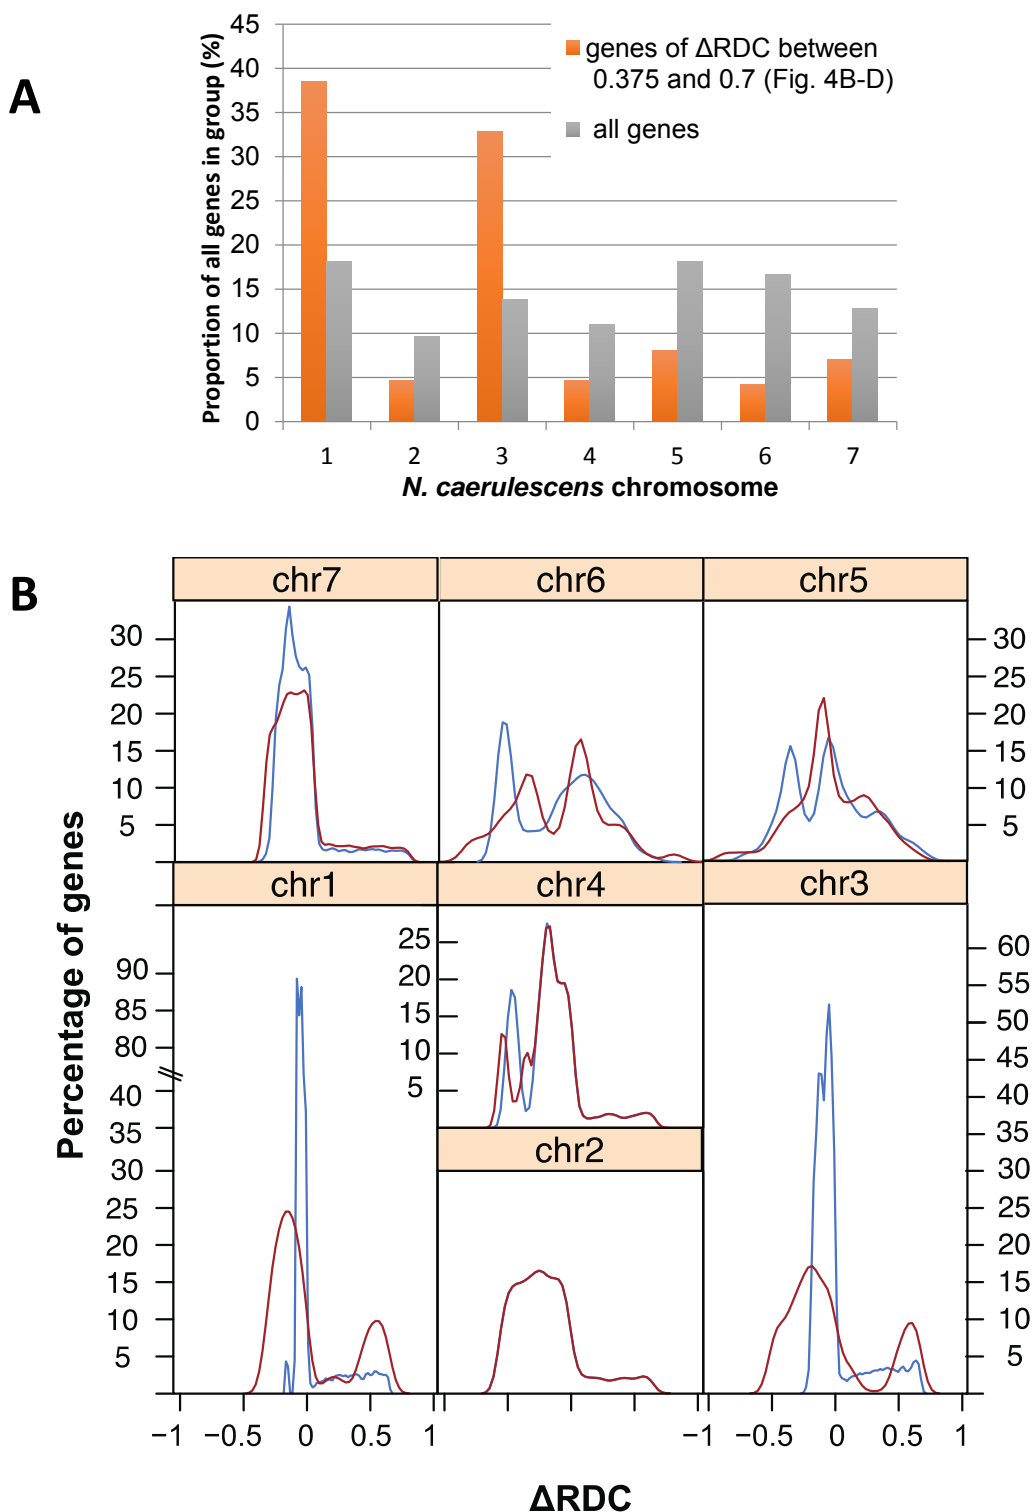

**Supplemental Figure 5.** Distribution of genes and chromosome position differences with respect to *A. thaliana* along chromosomes of *N. caeruleus* and the ancestral PCK genome. A, Distribution of genes on *N. caeruleus* chromosomes for all genes and genes exhibiting  $\Delta$ RDC between 0.375 and 0.7 (see Fig. 4). B,  $\Delta$ RDC profiles of all genes shown for each *N. caeruleus* chromosome (red) and PCK chromosome (blue) (cf. Fig. 4). The secondary peak in Fig. 4 is primarily attributable to changes in RDC on chromosomes NC1 and NC3 relative to the homeologous PCK chromosomes (and also in comparison to *A. thaliana*; see Fig. 4), thus causing major changes in the lengths of the bottom arms of these two chromosomes (see Figs. 2A-B).
